# Supplementary material for: Comparative transcriptomics and bioinformatics analysis of genes related to photosynthesis in Eucalyptus camaldulensis
Source: PeerJ. 2022 Nov 11;10:e14351. doi: 10.7717/peerj.14351 (PMC9661968; doi:10.7717/peerj.14351)
Supplement: Supplemental Information 2 [file peerj-10-14351-s002.xlsx]

## Sheet: mature leaves
光强	净光合速率Pn	Pn模型理论值
2000	16.2208	17.8265
1800	17.0668	17.5922
1600	17.3643	17.3069
1400	17.2421	16.9522
1200	17.076	16.4991
1000	16.7125	15.9001
800	15.7101	15.0711
600	14.2618	13.8482
400	11.9753	11.8633
200	7.9826	8.0817
150	6.27554	6.5333
100	4.12355	4.5319
80	3.20329	3.5573
60	2.20344	2.4536
40	1.14961	1.1933
20	-0.0494262	-0.2595
0	-1.51947	-1.9525
2000	18.9334	20.1676
1800	19.2348	19.8777
1600	19.4157	19.5255
1400	19.3275	19.0888
1200	19.0024	18.533
1000	18.24	17.8016
800	17.9261	16.7957
600	15.7625	15.3253
400	13.1959	12.9718
200	8.55193	8.5986
150	6.10066	6.8483
100	4.24526	4.62
80	3.31649	3.5484
60	2.12186	2.3454
40	0.880346	0.9851
20	-0.176331	-0.5653
0	-1.95976	-2.3489
2000	7.12004	7.12004
1800	7.06089	7.06089
1600	7.12365	7.12365
1400	7.44331	7.44331
1200	7.53039	7.53039
1000	7.36506	7.36506
800	7.39647	7.39647
600	7.06964	7.06964
400	7.00174	7.00174
200	5.41423	5.41423
150	4.76434	4.76434
100	3.8062	3.8062
80	3.0351	3.0351
60	1.99169	1.99169
40	1.02281	1.02281
20	-0.0732128	-0.0732128
0	-1.36359	-1.36359
2000	15.5217	15.038
1800	15.3589	14.8436
1600	15.1596	14.652
1400	14.91	14.4948
1200	14.5882	14.1875
1000	14.1575	13.6889
800	13.5517	13.0878
600	12.6365	12.081
400	11.0938	10.6123
200	7.94099	7.36484
150	6.56159	6.04865
100	4.69528	4.31937
80	3.75028	3.38027
60	2.64993	2.26356
40	1.35246	1.06707
20	-0.200297	-0.299338
0	-2.0919	-1.88833

## Sheet: young leaves
光强	净光合速率Pn	Pn模型理论值
2000	6.42168	6.499
1800	6.41144	6.4262
1600	6.26547	6.3365
1400	5.86823	6.223
1200	5.79237	6.075
1000	5.86095	5.874
800	5.72371	5.585
600	5.36006	5.1344
400	4.82023	4.3339
200	2.94268	2.5173
150	1.94802	1.6349
100	0.210492	0.3422
80	-0.682469	-0.3604
60	-1.49887	-1.2235
40	-2.57991	-2.3091
20	-3.90027	-3.7162
0	-5.20396	-5.6123
2000	0.786934	2.7521
1800	1.01838	2.7357
1600	1.28082	2.7152
1400	1.71607	2.689
1200	2.06654	2.6543
1000	2.54093	2.6061
800	3.04723	2.5347
600	3.07712	2.418
400	3.00397	2.193
200	1.82403	1.5774
150	1.27833	1.2104
100	0.254509	0.5623
80	-0.224604	0.139
60	-0.823744	-0.4714
40	-1.58925	-1.4279
20	-2.95017	-3.1411
0	-4.1906	-7.0974
2000	2.32123	2.8435
1800	2.15268	2.7976
1600	5.02415	2.7407
1400	3.46288	2.6687
1200	2.27422	2.5743
1000	1.66399	2.4453
800	1.43945	2.2584
600	1.3113	1.9633
400	0.995904	1.4277
200	0.0258014	0.1553
150	-0.118078	-0.4931
100	-1.56762	-1.4812
80	-1.92007	-2.0385
60	-2.54101	-2.7435
40	-3.34583	-3.6642
20	-4.96993	-4.9172
0	-6.42928	-6.7222
2000	4.20197	4.03153
1800	4.16451	3.9865
1600	4.11806	3.9308
1400	4.05893	3.86023
1200	3.98112	3.76787
1000	3.87412	3.6418
800	3.71769	3.45937
600	3.46732	3.1719
400	3.00205	2.65153
200	1.83718	1.41667
150	1.20895	0.784067
100	0.202327	-0.192233
80	-0.393338	-0.7533
60	-1.17807	-1.47947
40	-2.25884	-2.46707
20	-3.84215	-3.92483
0	-6.38467	-6.4773
