# Supplementary material for: Comparative transcriptomics and bioinformatics analysis of genes related to photosynthesis in Eucalyptus camaldulensis
Source: PeerJ. 2022 Nov 11;10:e14351. doi: 10.7717/peerj.14351 (PMC9661968; doi:10.7717/peerj.14351)
Supplement: Supplemental Information 3 [file peerj-10-14351-s003.xls]

## Sheet: Sheet1
Photo	Cond	Ci	Trmmol	VpdL	tissue	rep	PAR
6.42168	0.372743	381.353	3.45859	1.02832	young	1	2000
6.41144	0.24493	366.011	2.68377	1.17057	young	1	1800
6.26547	0.203008	359.985	2.31714	1.20421	young	1	1600
5.86823	0.190611	359.356	2.23598	1.233	young	1	1400
5.79237	0.194579	360.954	2.24084	1.21178	young	1	1200
5.86095	0.192866	359.675	2.22771	1.21485	young	1	1000
5.72371	0.187208	358.679	2.18064	1.22321	young	1	800
5.36006	0.183232	362.208	2.12231	1.21484	young	1	600
4.82023	0.180381	366.795	2.16937	1.26029	young	1	400
2.94268	0.171946	384.113	2.18544	1.32812	young	1	200
1.94802	0.164267	393.494	2.18162	1.38401	young	1	150
0.210492	0.159872	412.81	2.16291	1.40745	young	1	100
-0.682469	0.148613	422.725	2.05539	1.43386	young	1	80
-1.49887	0.140489	434.948	1.89664	1.39576	young	1	60
-2.57991	0.132214	450.837	1.75172	1.36611	young	1	40
-3.90027	0.131223	468.351	1.76409	1.38597	young	1	20
-5.20396	0.117545	494.502	1.59458	1.39294	young	1	0
0.786934	0.0355565	366.316	0.866252	2.42813	young	2	2000
1.01838	0.0344617	353.221	0.83339	2.41007	young	2	1800
1.28082	0.0363513	343.617	0.870365	2.38816	young	2	1600
1.71607	0.03699	325.244	0.865037	2.33294	young	2	1400
2.06654	0.0408342	318.493	0.935586	2.28886	young	2	1200
2.54093	0.0476012	314.506	1.06742	2.24514	young	2	1000
3.04723	0.0558062	311.519	1.22589	2.20588	young	2	800
3.07712	0.0588132	315.606	1.27286	2.17649	young	2	600
3.00397	0.0618631	321.178	1.29703	2.11109	young	2	400
1.82403	0.058	350.716	1.17761	2.04209	young	2	200
1.27833	0.0613386	368.995	1.21746	1.99846	young	2	150
0.254509	0.0604862	396.158	1.19975	1.99681	young	2	100
-0.224604	0.0577067	408.232	1.15329	2.01075	young	2	80
-0.823744	0.0533501	427.588	1.05073	1.9788	young	2	60
-1.58925	0.0486884	458.413	0.933374	1.92276	young	2	40
-2.95017	0.049124	502.105	0.941671	1.92343	young	2	20
-4.1906	0.0435155	560.423	0.833693	1.91869	young	2	0
2.32123	0.0450446	315.649	1.16077	2.56679	young	3	2000
2.15268	0.041405	314.376	1.06073	2.54884	young	3	1800
5.02415	0.101091	316.542	2.21238	2.22286	young	3	1600
3.46288	0.0672684	315.888	1.45986	2.18026	young	3	1400
2.27422	0.0518024	334.577	1.14253	2.20394	young	3	1200
1.66399	0.0521569	353.82	1.17412	2.24934	young	3	1000
1.43945	0.0579998	364.593	1.3365	2.30679	young	3	800
1.3113	0.0572981	364.415	1.37145	2.39549	young	3	600
0.995904	0.0562319	377.414	1.33735	2.37818	young	3	400
0.0258014	0.0582651	403.934	1.39603	2.39802	young	3	200
-0.118078	0.0547316	411.736	1.29495	2.36509	young	3	150
-1.56762	0.0566476	452.844	1.29552	2.28776	young	3	100
-1.92007	0.0589122	460.072	1.28283	2.1813	young	3	80
-2.54101	0.0589973	477.421	1.26256	2.14445	young	3	60
-3.34583	0.0558236	508.843	1.15541	2.07213	young	3	40
-4.96993	0.0580491	550.972	1.18497	2.04585	young	3	20
-6.42928	0.0547865	601.98	1.12182	2.05049	young	3	0
16.2208	0.175781	239.125	2.89512	1.72486	old	1	2000
17.0668	0.201122	249.218	3.16687	1.66292	old	1	1800
17.3643	0.215229	255.117	3.19254	1.57355	old	1	1600
17.2421	0.227663	261.906	3.27785	1.53426	old	1	1400
17.076	0.235122	266.943	3.27152	1.48686	old	1	1200
16.7125	0.233539	270.511	3.12065	1.42737	old	1	1000
15.7101	0.243694	282.763	3.16923	1.39437	old	1	800
14.2618	0.243271	293.488	3.07066	1.35355	old	1	600
11.9753	0.233527	308.507	2.90087	1.32828	old	1	400
7.9826	0.222029	340.648	2.70513	1.29809	old	1	200
6.27554	0.210177	352.804	2.58841	1.30714	old	1	150
4.12355	0.20523	371.45	2.55832	1.32108	old	1	100
3.20329	0.19341	378.625	2.45679	1.34116	old	1	80
2.20344	0.190708	388.044	2.38285	1.31781	old	1	60
1.14961	0.18591	397.86	2.36763	1.34132	old	1	40
-0.0494262	0.18455	409.46	2.35805	1.34508	old	1	20
-1.51947	0.170016	425.76	2.19533	1.3526	old	1	0
18.9334	0.216126	230.271	4.03749	1.97411	old	2	2000
19.2348	0.223459	232.601	3.92823	1.86209	old	2	1800
19.4157	0.242138	242.325	4.10135	1.80545	old	2	1600
19.3275	0.246854	248.178	4.08805	1.76772	old	2	1400
19.0024	0.255371	253.816	4.13542	1.73373	old	2	1200
18.24	0.25445	259.696	4.04005	1.69995	old	2	1000
17.9261	0.246312	261.748	3.79854	1.6472	old	2	800
15.7625	0.245626	280.012	3.6655	1.59397	old	2	600
13.1959	0.23376	296.873	3.39913	1.54778	old	2	400
8.55193	0.217678	332.444	3.06247	1.49018	old	2	200
6.10066	0.206938	351.556	2.91121	1.4851	old	2	150
4.24526	0.191398	366.219	2.69832	1.48097	old	2	100
3.31649	0.180021	374.442	2.51626	1.46287	old	2	80
2.12186	0.173564	386.138	2.4707	1.48674	old	2	60
0.880346	0.169639	397.97	2.4273	1.49243	old	2	40
-0.176331	0.158257	408.014	2.33377	1.53254	old	2	20
-1.95976	0.144868	432.321	2.11759	1.5119	old	2	0
7.12004	0.0970363	274.198	2.20962	2.30794	old	3	2000
7.06089	0.097583	276.466	2.13899	2.22271	old	3	1800
7.12365	0.098025	279.683	2.03423	2.10469	old	3	1600
7.44331	0.0978268	275.343	1.9586	2.03108	old	3	1400
7.53039	0.0986274	276.963	1.87602	1.93068	old	3	1200
7.36506	0.102431	283.596	1.88066	1.86671	old	3	1000
7.39647	0.102678	281.791	1.83811	1.82107	old	3	800
7.06964	0.105427	290.431	1.81502	1.75377	old	3	600
7.00174	0.103556	290.143	1.7282	1.69979	old	3	400
5.41423	0.105522	316.638	1.70445	1.64697	old	3	200
4.76434	0.104621	327.412	1.66171	1.61925	old	3	150
3.8062	0.104889	345.617	1.61117	1.56618	old	3	100
3.0351	0.105816	359.844	1.60641	1.54845	old	3	80
1.99169	0.107692	376.35	1.6434	1.55753	old	3	60
1.02281	0.10635	392.532	1.62919	1.56268	old	3	40
-0.0732128	0.105879	410.923	1.63061	1.57085	old	3	20
-1.36359	0.101491	433.821	1.56981	1.57532	old	3	0
