# Supplementary material for: Comparative transcriptomics and bioinformatics analysis of genes related to photosynthesis in Eucalyptus camaldulensis
Source: PeerJ. 2022 Nov 11;10:e14351. doi: 10.7717/peerj.14351 (PMC9661968; doi:10.7717/peerj.14351)
Supplement: Supplemental Information 4 [file peerj-10-14351-s004.xlsx]

## Sheet: Sheet1
	RP1	RP2	RP3	RP4	RP5	RP6	RBCMT1	RBCMT2	RPE1	RPE2
young leaves	1.001	1.114	1.054	1.207	1.085	1.291	0.903	1.141	1.004	1.008
mature leaves	13.471	15.129	7.664	23.143	6.007	7.784	9.008	11.725	27.607	5.005
	RP7	RP8	RP9	RP10	RBCMT3	RBCMT4	TIM1	TIM2
young leaves	1.407	1.119	1.052	1.208	0.917	1.141	0.908	1.146
mature leaves	0.101	0.505	0.832	0.215	0.451	0.673	0.107	0.251
